# Supplementary material for: La política europea de armamento
Source: Royal Society of Chemistry journal article supplement (doi:10.1039/c8fd00166a), 2003-01-01
Supplement: c8fd00166a1.pdf [file c8fd00166a1.pdf]

## Supplementary Information

### Visible Light-Driven Water Oxidation with a Ruthenium Sensitizer and a Cobalt-Based Catalyst Connected with a Polymeric Platform

Zeynep Kap,<sup>a</sup> and Ferdi Karadas<sup>\*ab</sup>

<sup>a</sup> Department of Chemistry, Bilkent University, 06800 Ankara, Turkey

<sup>b</sup> UNAM-Institute of Materials Science and Nanotechnology, Bilkent University, 06800  
Ankara, Turkey

\*karadas@fen.bilkent.edu.tr

## Figures

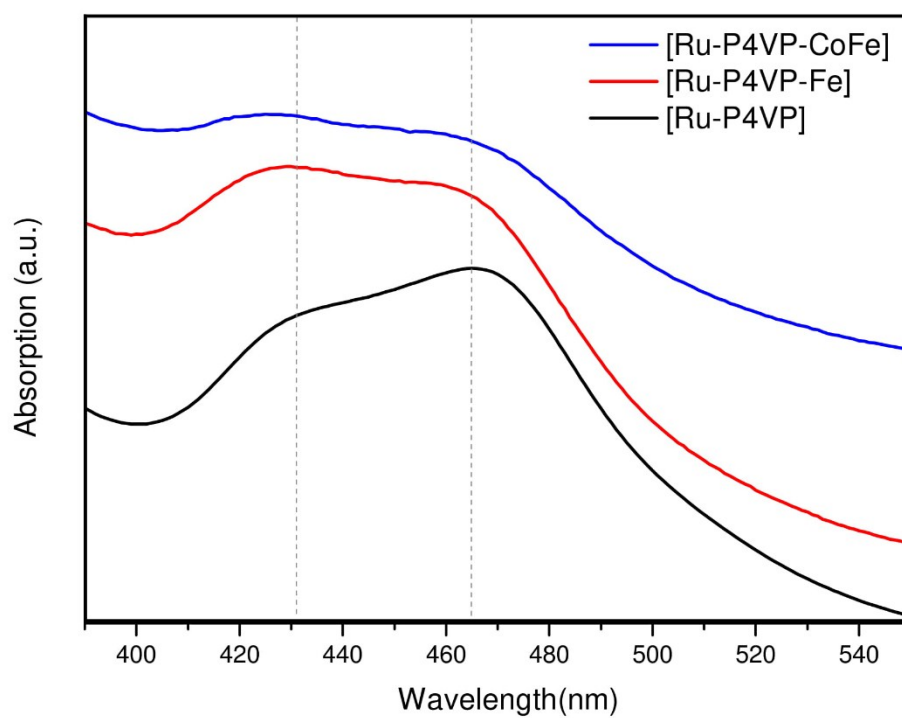

**Fig. S1** UV-Vis spectra of [Ru-P4VP] (black line), [Ru-P4VP-Fe] (red line), and [Ru-P4VP-CoFe] (blue line).

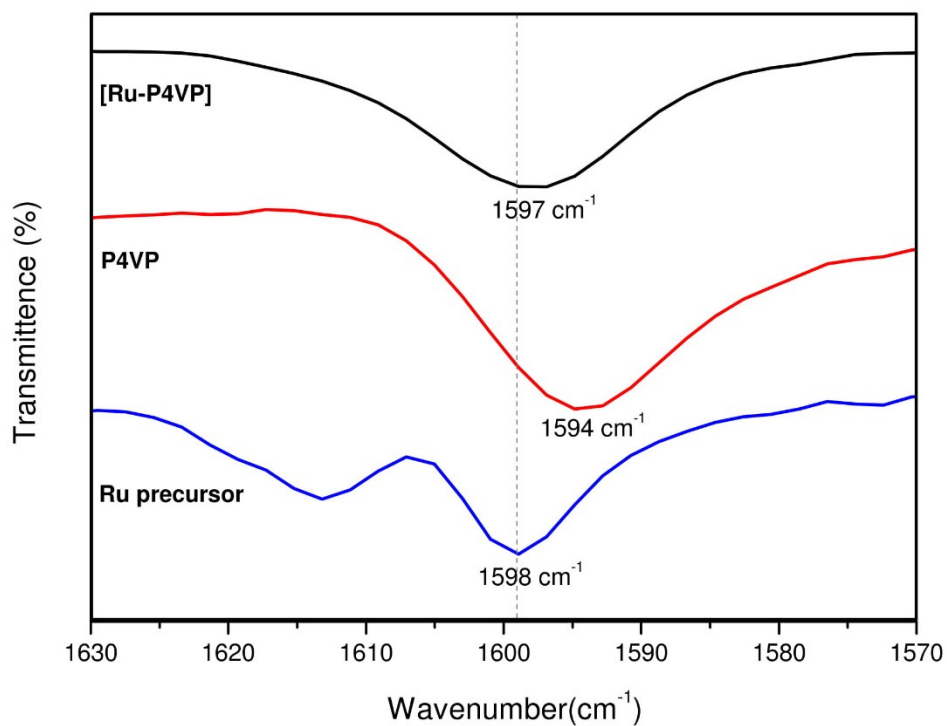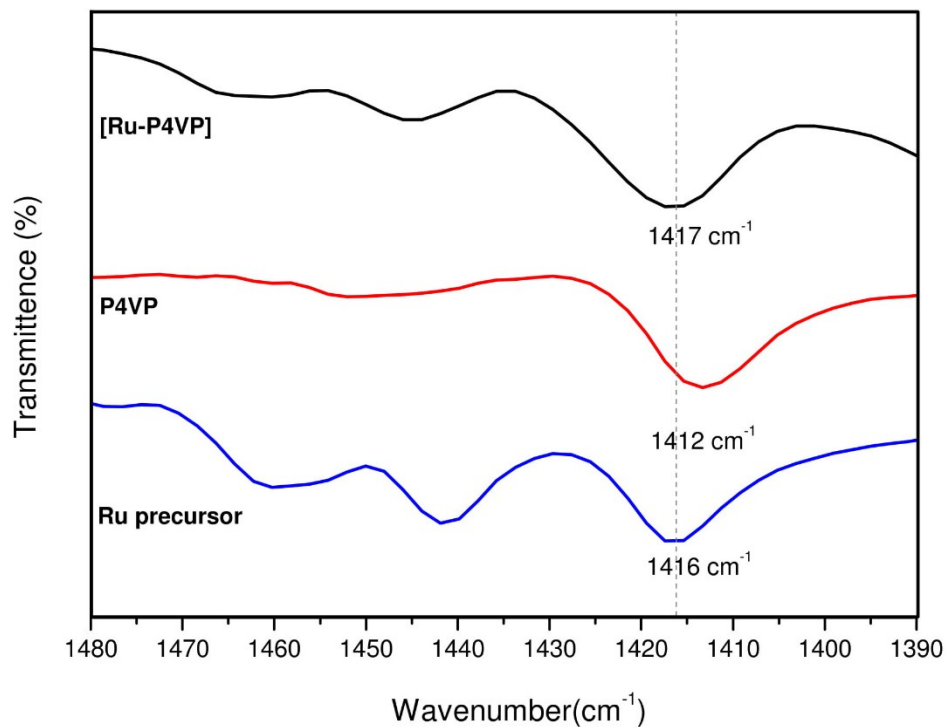

**Fig. S2** FTIR spectra of Ru precursor, P4VP, and [Ru-P4VP].

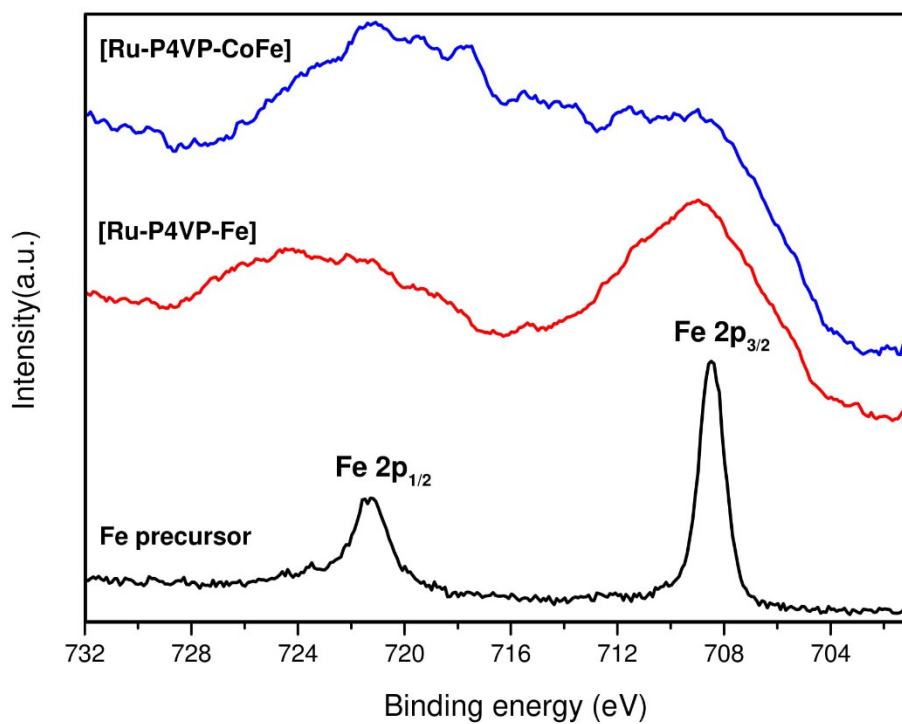

**Fig. S3** XPS spectra of Fe 2p signals of Fe precursor, [Ru-P4VP-Fe], and [Ru-P4VP-CoFe].

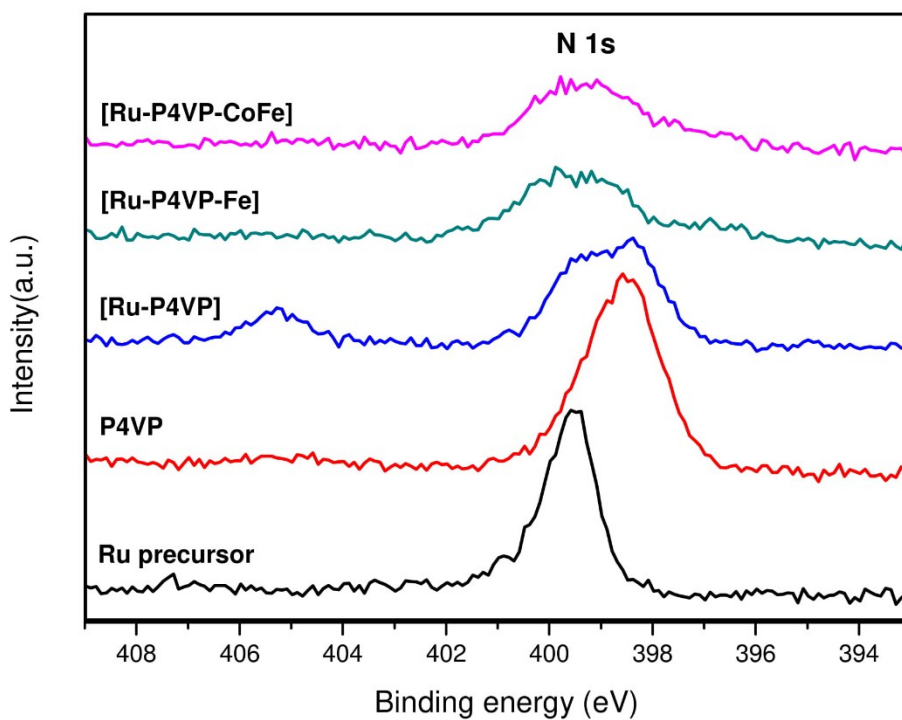

**Fig. S4** XPS spectra of N 1s signals of Ru precursor, P4VP, [Ru-P4VP], [Ru-P4VP-Fe], and [Ru-P4VP-CoFe].

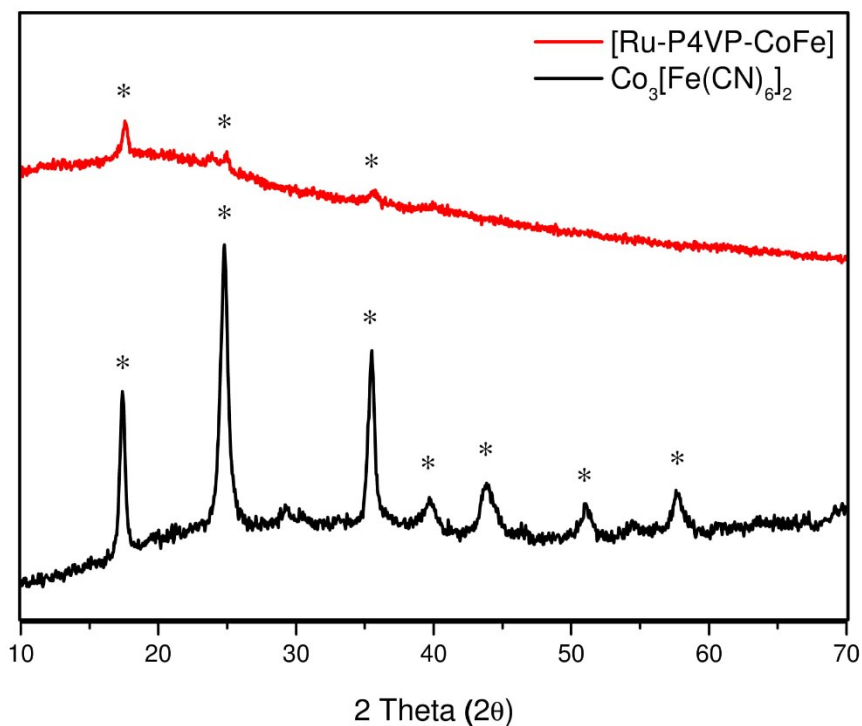

**Fig. S5** GI-XRD patterns of  $\text{Co}_3[\text{Fe}(\text{CN})_6]_2$  (black line), and  $[\text{Ru-P4VP-CoFe}]$  (red line). The peaks that belong to Prussian Blue analogue are marked with asterisk (\*).

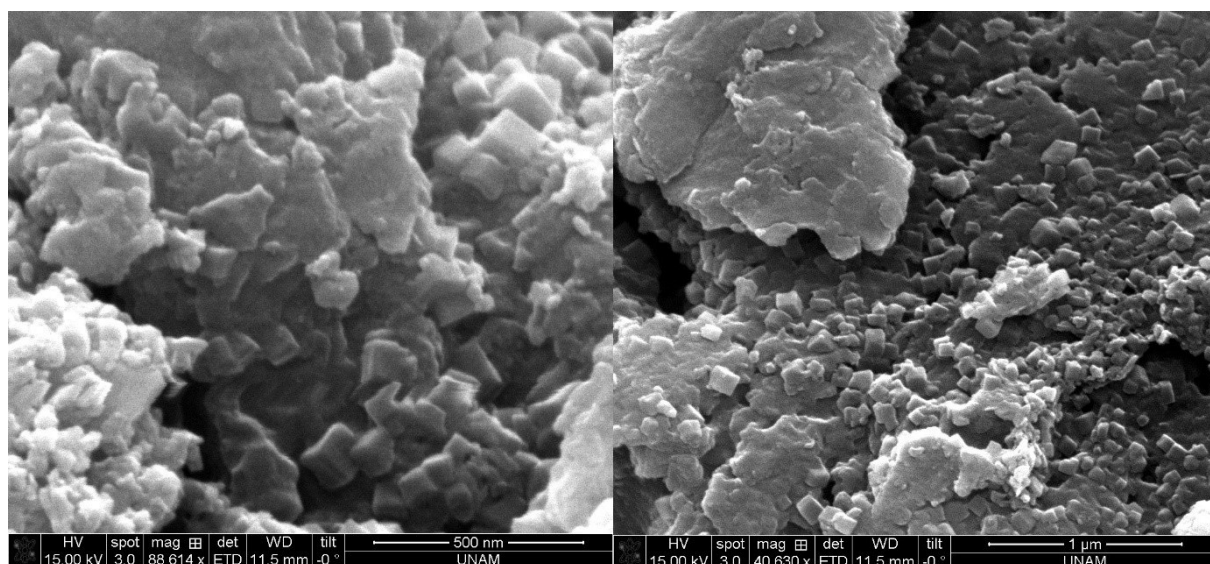

**Fig. S6** SEM images of  $[\text{Ru-P4VP-CoFe}]$ .

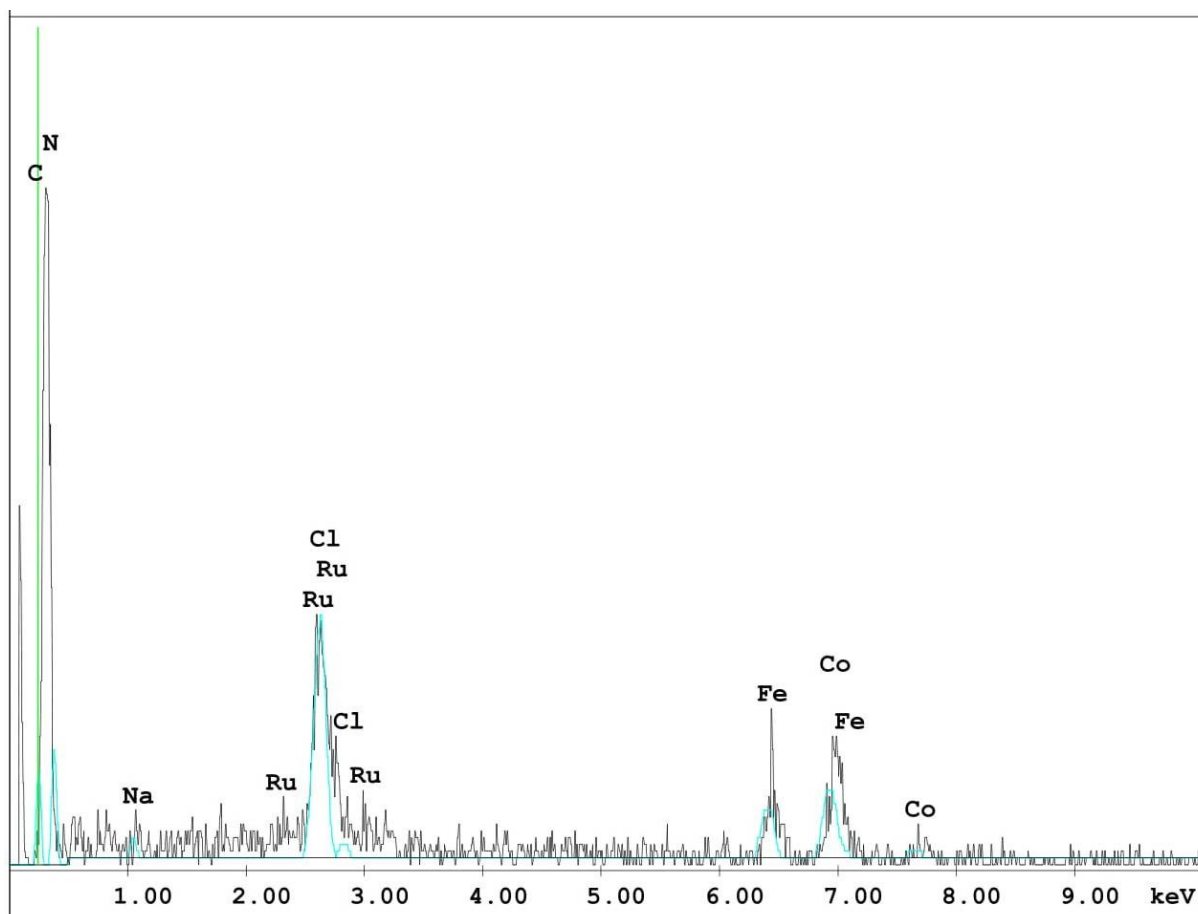

**Fig. S7** EDX spectrum of [Ru-P4VP-CoFe].

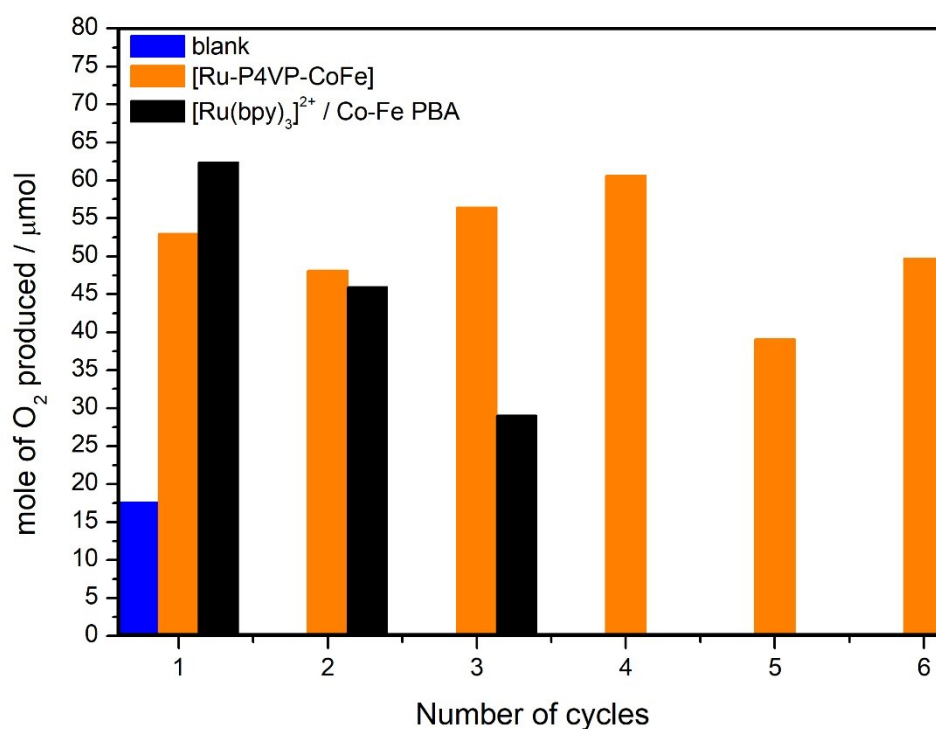

**Fig. S8.** Photocatalytic oxygen evolution by [Ru-P4VP-CoFe] (orange bar), [Ru(bpy)<sub>3</sub>]<sup>2+</sup> / Co-Fe PBA system (black bar), and [Ru(bpy)<sub>3</sub>]<sup>2+</sup> / Co-Fe PBA system without electron scavenger (blue bar). All experiments were performed in solution of 10 mL phosphate pH 7.0 buffer and 25 mg sodium persulfate.

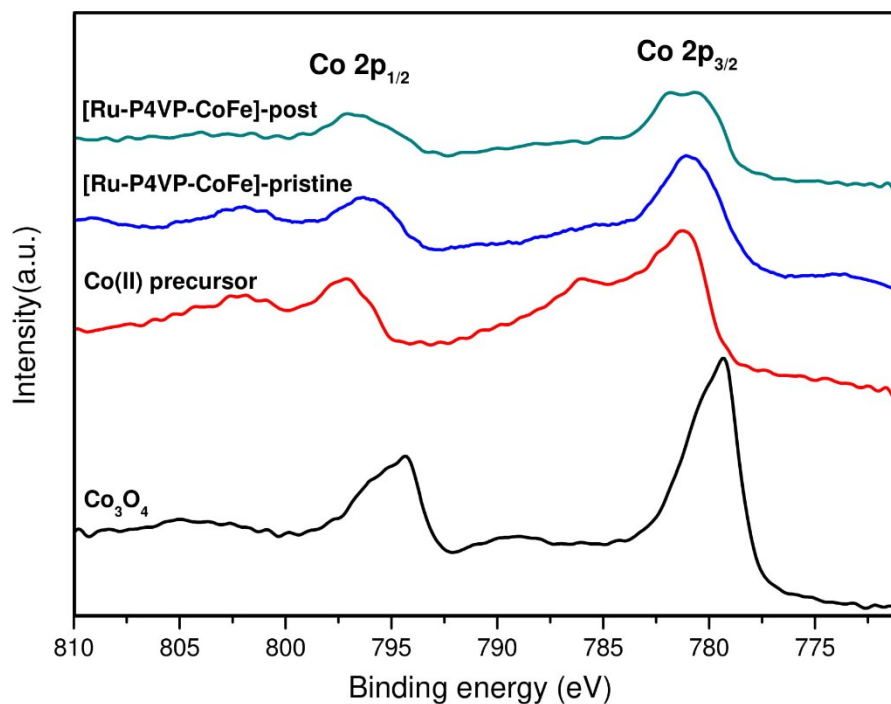

**Fig. S9** XPS spectra of Co 2p signals of  $\text{Co}_3\text{O}_4$ , Co(II) precursor, [Ru-P4VP-CoFe], and [Ru-P4VP-CoFe] after six catalytic cycle.

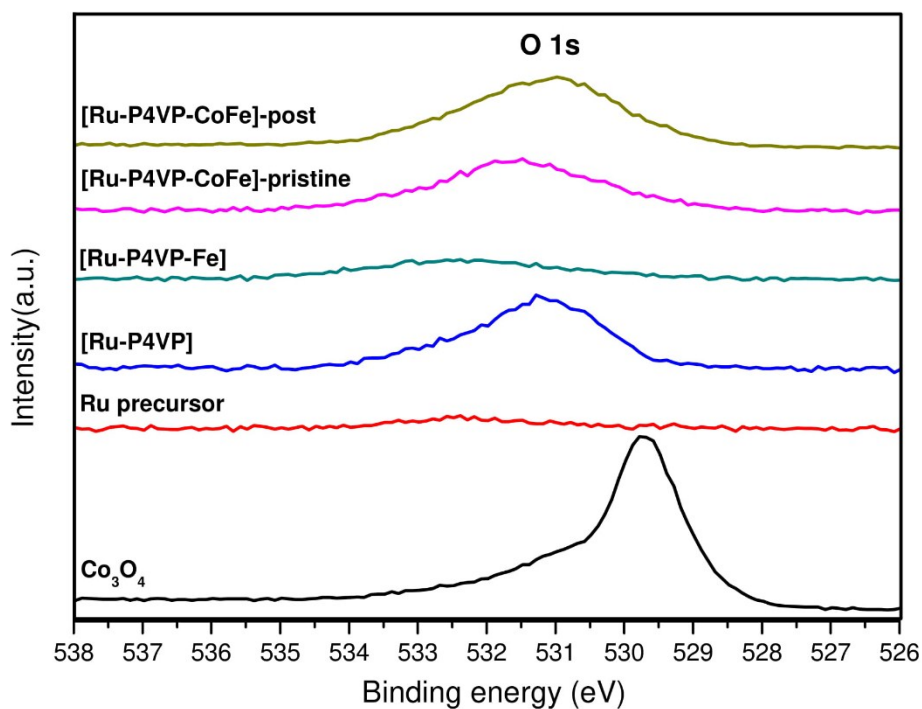

**Fig. S10** XPS spectra of O 1s signals of  $\text{Co}_3\text{O}_4$ , Ru precursor, [Ru-P4VP], [Ru-P4VP-Fe], [Ru-P4VP-CoFe], and [Ru-P4VP-CoFe] after six catalytic cycle.



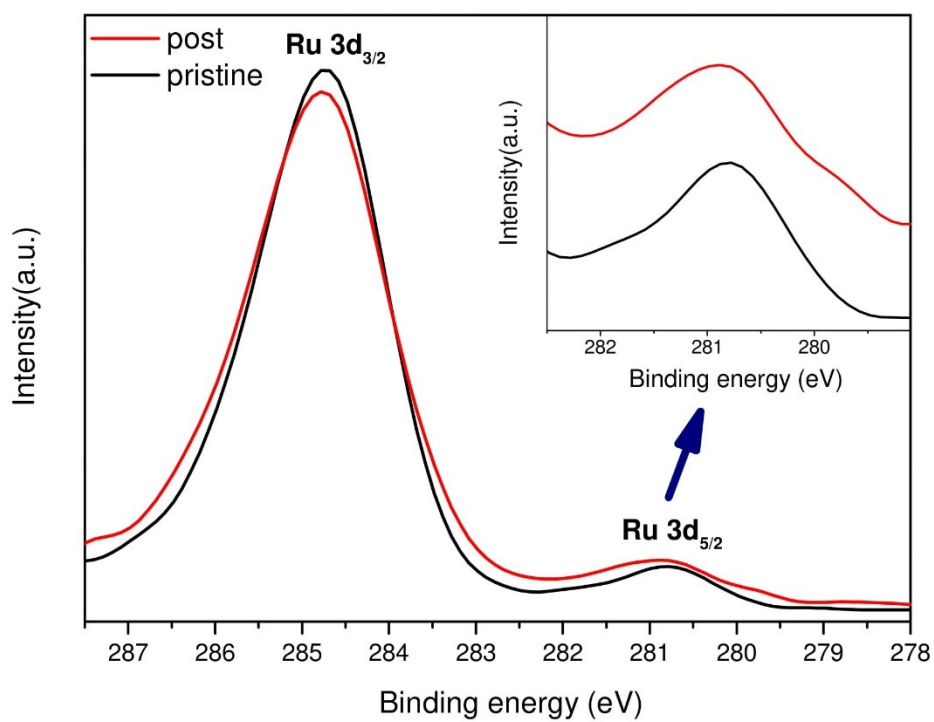

**Fig. S11** XPS spectra of Ru 3d<sub>5/2</sub> signals of pristine [Ru-P4VP-CoFe], and [Ru-P4VP-CoFe] after six catalytic cycles.

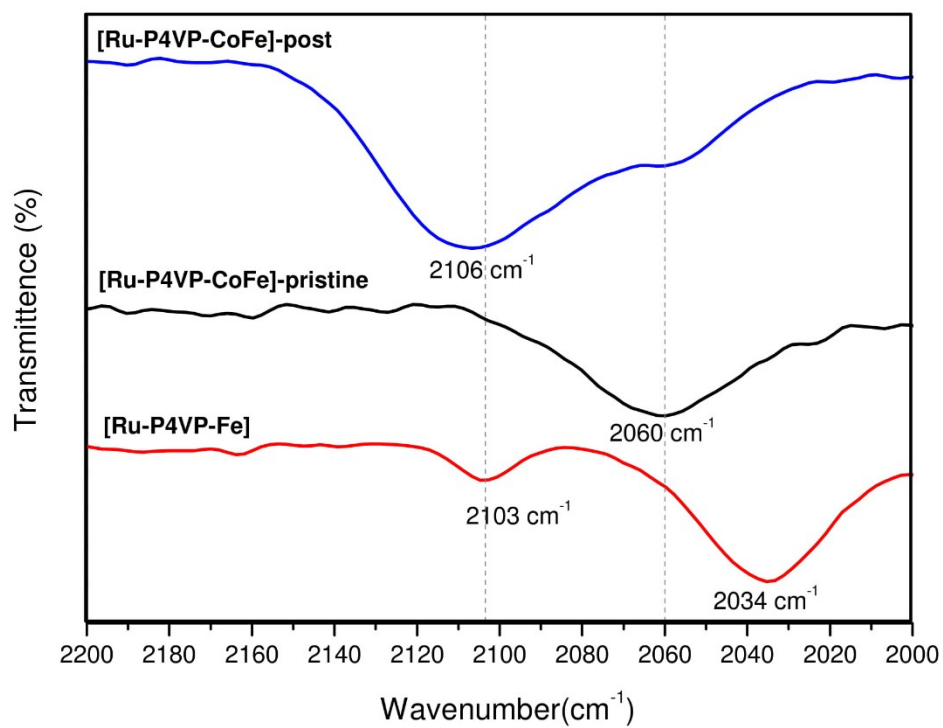

**Fig. S12** FTIR spectra of [Ru-P4VP-Fe], [Ru-P4VP-CoFe], and [Ru-P4VP-CoFe] after six catalytic cycle.

### Photocatalytic Studies

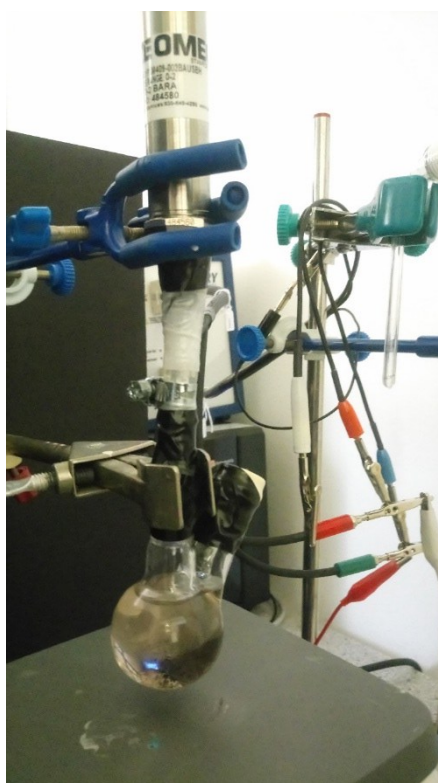

For each photocatalytic measurement, 10 mL phosphate pH 7.0 buffer was used, and 25 mg sodium persulfate was added as the electron scavenger. All measurements were done under constant stirring, and flask were covered with aluminum foil until the light was on. Pressure transducer was connected to two-neck round-bottom flask and one neck was covered with septa. Before light illumination, solution was purged with N<sub>2</sub> for 30 min, and two needles were used for N<sub>2</sub> in and out. When plateau was observed on pressure, 100 μL from the headspace of the cell was injected with gas-tight syringe into a gas chromatograph as an initial measurement. Pressure was allowed to reach plateau, and followingly light was on for 1 h. After 1 h of light illumination, light was off, and gas phase was analyzed by GC. During the process, pressure change was recorded versus time. Blank measurement was also taken according to the same procedure. Solution was consisted of 10 mL phosphate pH 7.0 buffer, and 25 mg sodium persulfate. TOF and TON were derived by using the data obtained from GC. O<sub>2</sub> to N<sub>2</sub> area ratio were calculated, and the value was multiplied with the headspace volume of the cell, then divided by injection volume of the gas tight syringe to obtain total O<sub>2</sub> amount in the cell. Subsequently, total O<sub>2</sub> amount of blank measurement and initial measurement were subtracted from the final experimental value.

Galan-Mascaros et al. reported that the TOF obtained was  $4.5 \times 10^{-4} \text{ s}^{-1}$ , and it was used as a reference value. [1] 5 mg [Ru(bpy)<sub>3</sub>]<sup>2+</sup>, 5 mg Co-Fe PBA, and 25 mg sodium persulfate were dissolved in 10 mL phosphate pH 7.0 buffer, and photocatalytic experiment was conducted according to the above procedure.

After necessary subtractions, total amount of O<sub>2</sub> obtained was multiplied with a constant which will give TOF of  $4.5 \times 10^{-4} \text{ s}^{-1}$  to obtain mole of O<sub>2</sub> produced. Mole of O<sub>2</sub> was used to calculate TOF, and equation is as follows:

$$\text{mole of O}_2 \text{ produced} = \text{total O}_2 \text{ amount} \times \text{constant}$$

$$\text{TOF} = \text{mole of O}_2 \text{ produced} / (\text{mole of catalyst} \times \text{time})$$

Constant derived according to the calculations were then used in [Ru-P4VP-CoFe] measurements to obtain mole of O<sub>2</sub>, TOF, and TON values. For mole of catalyst value, it is assumed that all Co sides are active for water oxidation. TON equation is as follows:

$$\text{TON} = \text{TOF} \times \text{time}$$

After each photocatalytic experiment of [Ru-P4VP-CoFe] and [Ru(bpy)<sub>3</sub>]<sup>2+</sup> and Co-Fe PBA systems, samples were kept in fridge for 1 day and re-used with the addition of 25 mg sodium persulfate.

## Reference

[1] S. Goberna-Ferrón, W. Y. Hernández, B. Rodríguez-García and J. R. Galán-Mascarós, ACS Catal., 2014, 4, 1637–1641.
